# Supplementary material
Source: HighWire-hosted journal article supplement (https://bmjopen.bmj.com/content/14/3/e082060)
Supplement: inline-supplementary-material-1 [file inline-supplementary-material-1.pdf]

## Midwives' Experiencing Telehealth Clinical Practice

1

## Supplemental Materials:

## Examples of Search Strategy

| Database: PubMed (MEDLINE)                     |                                                                                                                                                                                                                                                                                                                                                                                                                                                                                                                                                                                                                   |                   |
|------------------------------------------------|-------------------------------------------------------------------------------------------------------------------------------------------------------------------------------------------------------------------------------------------------------------------------------------------------------------------------------------------------------------------------------------------------------------------------------------------------------------------------------------------------------------------------------------------------------------------------------------------------------------------|-------------------|
| Date: 1/1/2010- 2/9/2022 results below         |                                                                                                                                                                                                                                                                                                                                                                                                                                                                                                                                                                                                                   |                   |
| Date rerun: 2/10/22- 8/16/2022: additional 259 |                                                                                                                                                                                                                                                                                                                                                                                                                                                                                                                                                                                                                   |                   |
| Set #                                          | Search terms/ keyword                                                                                                                                                                                                                                                                                                                                                                                                                                                                                                                                                                                             | Results           |
| 1                                              | (midwives OR midwife OR "Midwifery"[Mesh] OR "Nurse Midwives"[Mesh])<br>2010-2022                                                                                                                                                                                                                                                                                                                                                                                                                                                                                                                                 | 41,954 results    |
| 2                                              | (telehealth OR telemedicine OR "Telemedicine"[Mesh] OR eHealth OR mHealth OR "mobile health" OR videoconferencing OR videoconference OR "Videoconferencing"[Mesh] OR "mobile app" OR "mobile applications" OR "Mobile Applications"[Mesh] OR app OR apps OR zoom OR "virtual consultation" OR "video consultation" OR "remote care" OR "virtual visits" OR "remote visits" OR "work-from-home" OR "digital technology" OR "Digital Technology"[Mesh] OR remote or telephone or "text messaging" or text OR texting OR "chats" OR "chatting" OR "Computers, Handheld"[Mesh] OR "Cell Phone"[mesh] OR "cell phone") | 242,981 results   |
| 3                                              | (experience OR experiences OR views OR view OR viewpoint OR perception OR perceptions OR acceptance OR accept OR accepts OR acceptability OR acceptable OR satisfaction OR dissatisfaction OR barrier OR barriers OR adapt OR adapts OR adaptability OR utilization OR "Lived experience" OR favorable OR unfavorable OR meaningful OR unmeaningful OR appropriateness OR inappropriateness OR perspective OR perspectives OR feasibility OR "Health Knowledge, Attitudes, Practice"[Mesh] OR "Perception"[Mesh] OR "Communication Barriers"[Mesh])                                                               | 4,266,351 results |
| 4<br>Combined                                  | #1 AND #2 AND #3                                                                                                                                                                                                                                                                                                                                                                                                                                                                                                                                                                                                  | 2,252 results     |

| Database: Psych INFO, Psych Articles,             |  |  |
|---------------------------------------------------|--|--|
| Date: 2/8/2022 1/1/2010 to 2/9/2022 results below |  |  |

## Midwives' Experiencing Telehealth Clinical Practice

2

| Date rerun: 2/10/2022-8/16/2022 Additional articles 21 |                                                                                                                                                                                                                                                                                                                                                                                                                                            |         |
|--------------------------------------------------------|--------------------------------------------------------------------------------------------------------------------------------------------------------------------------------------------------------------------------------------------------------------------------------------------------------------------------------------------------------------------------------------------------------------------------------------------|---------|
| Set #                                                  | Search terms/ keyword                                                                                                                                                                                                                                                                                                                                                                                                                      | Results |
| 1                                                      | (midwives OR midwife OR midwifery OR "Nurse Midwives")                                                                                                                                                                                                                                                                                                                                                                                     | 10,933  |
| 2                                                      | (experience OR experiences OR views OR view OR viewpoint OR perception OR perceptions OR acceptance OR accept OR accepts OR acceptability OR acceptable OR satisfaction OR dissatisfaction OR barrier OR barriers OR adapt OR adapts OR adaptability OR utilization OR "Lived experience" OR favorable OR unfavorable OR meaningful OR unmeaningful OR appropriateness OR inappropriateness OR perspective OR perspectives OR feasibility) | 905,143 |
| 3                                                      | (telehealth OR telemedicine OR eHealth OR mHealth OR "mobile health" OR videoconferencing OR videoconference OR "mobile app" OR "Mobile applications" OR app OR apps OR zoom OR "virtual consultation" OR "video consultation" OR "remote care" OR "virtual visits" OR "remote visits" OR "work-from-home" OR "digital technology" OR remote or telephone or "text messaging" or text OR texting OR "chats" OR "chatting" OR "cell phone") | 93,731  |
| 4<br>Combined                                          | #1 AND#2 AND#3                                                                                                                                                                                                                                                                                                                                                                                                                             | 475     |

| Database: Embase                |                       |         |
|---------------------------------|-----------------------|---------|
| Date: 1/1/2010-2022 - 8/17/2022 |                       |         |
| Set #                           | Search terms/ keyword | Results |
|                                 |                       |         |

## Midwives' Experiencing Telehealth Clinical Practice

3

|                   |                                                                                                                                                                                                                                                                                                                                                    |           |
|-------------------|----------------------------------------------------------------------------------------------------------------------------------------------------------------------------------------------------------------------------------------------------------------------------------------------------------------------------------------------------|-----------|
| 1                 | ((digital AND ('technology'/exp OR technology) or mobile) AND ('health'/exp OR health) OR 'telehealth'/exp or 'telehealth OR 'zoom'/exp OR zoom OR 'videoconferencing'/exp OR 'videoconferncing' OR 'telemedicine'/exp OR 'telemedicine OR 'text messaging/exp' OR 'text messaging' OR 'mobile phone'/exp OR 'mobile phone') and [2010-2022]py     | 164572    |
| 2                 | ('attitude'/exp OR 'attitude' OR perspectives or 'viewpoint'/exp OR 'viewpoint' OR 'utilization'/ exp OR 'utilization' OR 'satisfaction/exp' OR 'satisfaction' or 'visibility'/exp OR 'visibility ' OR 'personal experience'/exp OR 'personal experience' OR 'experience/exp OR 'experience OR 'perception'/exp OR 'perception') and [2010-2022]py | 2,083,662 |
| 3                 | ('midwife/exp OR 'midwife' OR 'nurse midwife'/exp OR 'nurse midwife' OR 'midwives'/exp OR 'midwives) and [2010-2022]py                                                                                                                                                                                                                             | 24,474    |
| 4<br>Combine<br>d | #1 AND#2 AND #3                                                                                                                                                                                                                                                                                                                                    | 235       |

| Database: Web of Science.<br>1/1/2010 to 2/8/2022 results below<br>Re-run each search custom date 2/09/2022-8/16/2022<br>Additional articles: 249 |                                                                                                                                                                                                                                                                                                                                                                                                                                            |           |
|---------------------------------------------------------------------------------------------------------------------------------------------------|--------------------------------------------------------------------------------------------------------------------------------------------------------------------------------------------------------------------------------------------------------------------------------------------------------------------------------------------------------------------------------------------------------------------------------------------|-----------|
| Set #                                                                                                                                             | Search terms/ keyword                                                                                                                                                                                                                                                                                                                                                                                                                      | Results   |
| 1                                                                                                                                                 | (midwives OR midwife OR midwifery OR "Nurse Midwives")                                                                                                                                                                                                                                                                                                                                                                                     | 56,061    |
| 2                                                                                                                                                 | (experience OR experiences OR views OR view OR viewpoint OR perception OR perceptions OR acceptance OR accept OR accepts OR acceptability OR acceptable OR satisfaction OR dissatisfaction OR barrier OR barriers OR adapt OR adapts OR adaptability OR utilization OR "Lived experience" OR favorable OR unfavorable OR meaningful OR unmeaningful OR appropriateness OR inappropriateness OR perspective OR perspectives OR feasibility) | 5,937,044 |

## Midwives' Experiencing Telehealth Clinical Practice

4

|               |                                                                                                                                                                                                                                                                                                                                                                                                                                                   |           |
|---------------|---------------------------------------------------------------------------------------------------------------------------------------------------------------------------------------------------------------------------------------------------------------------------------------------------------------------------------------------------------------------------------------------------------------------------------------------------|-----------|
| 3             | (telehealth OR telemedicine OR eHealth OR mHealth OR "mobile health" OR videoconferencing OR videoconference OR "mobile app" OR "Mobile applications" OR <b>app OR apps OR zoom</b> OR "virtual consultation" OR "video consultation" OR "remote care" OR "virtual visits" OR "remote visits" OR "work-from-home" OR "digital technology" OR remote or telephone or "text messaging" or text OR texting OR "chats" OR "chatting" OR "cell phone") | 1,007,781 |
| 4<br>Combined | #1 AND #2 AND #3                                                                                                                                                                                                                                                                                                                                                                                                                                  | 2,368     |

| Database: CINAHL COMPLETE                          |                                                                                                                                                                                                                                                                                                                                                                                                                                            |         |
|----------------------------------------------------|--------------------------------------------------------------------------------------------------------------------------------------------------------------------------------------------------------------------------------------------------------------------------------------------------------------------------------------------------------------------------------------------------------------------------------------------|---------|
| Date: 1/01/2010-2/8/2022                           |                                                                                                                                                                                                                                                                                                                                                                                                                                            |         |
| Re-run each search custom date 2/01/2022-8/16/2022 |                                                                                                                                                                                                                                                                                                                                                                                                                                            |         |
| Additional articles: 30                            |                                                                                                                                                                                                                                                                                                                                                                                                                                            |         |
| Set #                                              | Search terms/ keyword                                                                                                                                                                                                                                                                                                                                                                                                                      | Results |
| 1                                                  | (midwives OR midwife OR midwifery OR "Nurse Midwives")                                                                                                                                                                                                                                                                                                                                                                                     | 42,142  |
| 2                                                  | (experience OR experiences OR views OR view OR viewpoint OR perception OR perceptions OR acceptance OR accept OR accepts OR acceptability OR acceptable OR satisfaction OR dissatisfaction OR barrier OR barriers OR adapt OR adapts OR adaptability OR utilization OR "Lived experience" OR favorable OR unfavorable OR meaningful OR unmeaningful OR appropriateness OR inappropriateness OR perspective OR perspectives OR feasibility) | 911,588 |
| 3                                                  | (telehealth OR telemedicine OR eHealth OR mHealth OR "mobile health" OR videoconferencing OR videoconference OR "mobile app" OR "Mobile applications" OR app OR apps OR zoom OR "virtual consultation" OR "video consultation" OR "remote care" OR "virtual visits" OR "remote visits" OR "work-from-home" OR "digital                                                                                                                     | 113,909 |

## Midwives' Experiencing Telehealth Clinical Practice

5

|               |                                                                                                                     |     |
|---------------|---------------------------------------------------------------------------------------------------------------------|-----|
|               | technology" OR remote or telephone or "text messaging" or text OR texting OR "chats" OR "chatting" OR "cell phone") |     |
| 4<br>Combined | #1 AND #2 AND #3                                                                                                    | 597 |

## Midwives' Experiencing Telehealth Clinical Practice

6

## Mixed Methods Appraisal Tool Results (17)

| Mixed Methods Appraisal Tool Criteria Results |                                                                                                                                                                                            |     |     |     |     |     |     |     |     |     |     |     |     |     |     |     |     |     |
|-----------------------------------------------|--------------------------------------------------------------------------------------------------------------------------------------------------------------------------------------------|-----|-----|-----|-----|-----|-----|-----|-----|-----|-----|-----|-----|-----|-----|-----|-----|-----|
| Studies                                       | Results                                                                                                                                                                                    | S.1 | S.2 | 1.1 | 1.2 | 1.3 | 1.4 | 1.5 | 4.1 | 4.2 | 4.3 | 4.4 | 4.5 | 5.1 | 5.2 | 5.3 | 5.4 | 5.5 |
| Bailey et al.                                 | Appraisal 80%<br>4.2 No, lacks clear indication of representative sample of target population                                                                                              | Y   | Y   |     |     |     |     |     | Y   | N   | Y   | Y   | Y   |     |     |     |     |     |
| Bradfield et al.                              | Appraisal 60%<br>4.2 No, sample is not representative of population<br>4.4 No, lacks indicators of low non-response bias                                                                   | Y   | Y   |     |     |     |     |     | Y   | N   | Y   | N   | Y   |     |     |     |     |     |
| Galle et al.                                  | Appraisal 60%<br>4.3 Can't tell, limited information on the survey development of measurements<br>4.4 No, lacks indicators of low non-response bias and lacks information on response rate | Y   | Y   |     |     |     |     |     | Y   | Y   | C   | N   | Y   |     |     |     |     |     |
| Gemperle et al.                               | Appraisal 60%<br>4.3 Can't tell, limited information on the survey development of measurements<br>4.4 No, high non-response rate not adequately addressed                                  | Y   | Y   |     |     |     |     |     | Y   | Y   | C   | N   | Y   |     |     |     |     |     |
| Hearn et al.                                  | Appraisal 80%<br>1.5 No, lacks clear link between data and analysis i.e., definition of telehealth is too narrow, presented data requires broader definition                               | Y   | Y   | Y   | Y   | Y   | Y   | N   |     |     |     |     |     |     |     |     |     |     |
| Henry et al.                                  | Appraisal 60%<br>5.2 No, no joint display or integration of mixed methods                                                                                                                  | Y   | Y   | Y   | Y   | Y   | Y   | Y   | Y   | Y   | C   | Y   | Y   | Y   | N   | N   | Y   | Y   |

## Midwives' Experiencing Telehealth Clinical Practice

7

|                  |                                                                                                                                                                                                                                                                                                                  |   |   |   |   |   |   |   |   |   |   |   |   |   |   |   |   |   |   |
|------------------|------------------------------------------------------------------------------------------------------------------------------------------------------------------------------------------------------------------------------------------------------------------------------------------------------------------|---|---|---|---|---|---|---|---|---|---|---|---|---|---|---|---|---|---|
|                  | components at collection, analysis or interpretative phase<br>5.3 No, unable to interpret outputs with lack of integrated data                                                                                                                                                                                   |   |   |   |   |   |   |   |   |   |   |   |   |   |   |   |   |   |   |
| Jacobsen et al.  | Appraisal 80%<br>1.3 No, the systematic methods for data collection and analysis for using IP approach are not adequately explained                                                                                                                                                                              | Y | Y | Y | Y | N | Y | Y |   |   |   |   |   |   |   |   |   |   |   |
| Perrenoud et al. | Appraisal 60%<br>1.4 Insufficient explanation of data analysis process, vague and broad approach to describing methods, and lacks specific qualitative approach<br><br>1.5 Can't tell, whether coherence can be determined due to the lack of detailed information about analysis, positionality and reflexivity | Y | Y | Y | Y | N | Y | C |   |   |   |   |   |   |   |   |   |   |   |
| Rousseau et al.  | Appraisal 80%<br>5.4 No, insufficient explanation for divergences between qualitative and quantitative data                                                                                                                                                                                                      | Y | Y | Y | Y | Y | Y | Y | Y | Y | Y | Y | Y | Y | Y | Y | Y | N | Y |
| Spiby et al.     | Appraisal 80% 1.4 No, insufficient data collected to substantiate the principle finding                                                                                                                                                                                                                          | Y | Y | Y | Y | Y | N | Y |   |   |   |   |   |   |   |   |   |   |   |

Midwives' Experiencing Telehealth Clinical Practice

8
